# Supplementary material for: Nanoarrays of tethered lipid bilayer rafts on poly(vinyl alcohol) hydrogels
Source: Royal Society of Chemistry journal article supplement (doi:10.1039/b809732a), 2008-10-23
Supplement: b809732a.pdf [file b809732a.pdf]

Supplementary information

## **Nanoarrays of Tethered Lipid Bilayer Rafts on Poly(vinyl alcohol) Hydrogels**

Bong Kuk Lee,<sup>\*a</sup> Hea Yeon Lee,<sup>\*a</sup> Pilnam Kim,<sup>b</sup> Kahp Y. Suh<sup>b</sup> and Tomoji Kawai

<sup>a</sup> *The Institute of Scientific and Industrial Research (ISIR), Osaka University, 8-1 Mihogaoka, Ibaraki, Osaka 567-0047, Japan. Fax: +81-6-6875-2440; Tel: +81-6-6879-8447; E-mail: [hylee@sanken.osaka-u.ac.jp](mailto:hylee@sanken.osaka-u.ac.jp); [bklee32@sanken.osaka-u.ac.jp](mailto:bklee32@sanken.osaka-u.ac.jp)*

<sup>b</sup> *School of Mechanical and Aerospace Engineering, Seoul National University, Seoul 151-742, Korea.*

### **PVA coating and UV irradiation**

To control the initial thickness of PVA films, 3 wt% PVA diluted with Milli-Q was spin-coated onto SiO<sub>2</sub> or gold substrates at 500 rpm for 5 s, followed by 2000, 3000, 4000 and 5000 rpm for 20 s. The PVA coated substrates were soft baked at 50 °C for 5 min and were then exposed under a UV lamp (365 nm, 4000 mW cm<sup>-2</sup>) for various times and rinsed with Milli-Q of 50 °C for 1 min. The thickness of dry PVA films before and after 365 nm UV irradiation was determined by Alpha-Step 500 surface profiler (Tencor Instruments Inc., USA) with a scan length of 100 μm at a scan speed of 10 μm/sec.

### **Differential scanning calorimetry (DSC)**

The glass transition temperature ( $T_g$ ) of PVA was measured employing differential scanning calorimetry (DSC220CU, Seiko Instruments Inc., Japan). Dry sample (8.3 mg) with the rotary evaporator was heated from 0 to 130 °C at a heating rate of 10 °C min<sup>-1</sup> under nitrogen flow (30 mL min<sup>-1</sup>). The  $T_g$  of sample was determined from the DSC curve recorded in the first heating scan.

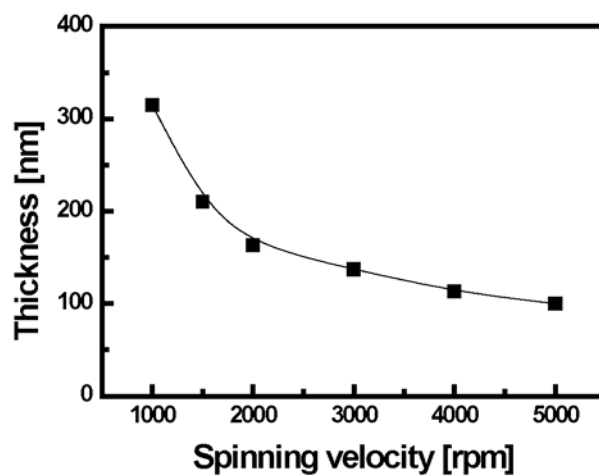

**Fig. S1** Relationship between spinning velocity and thickness of 3 wt% PAV layer.

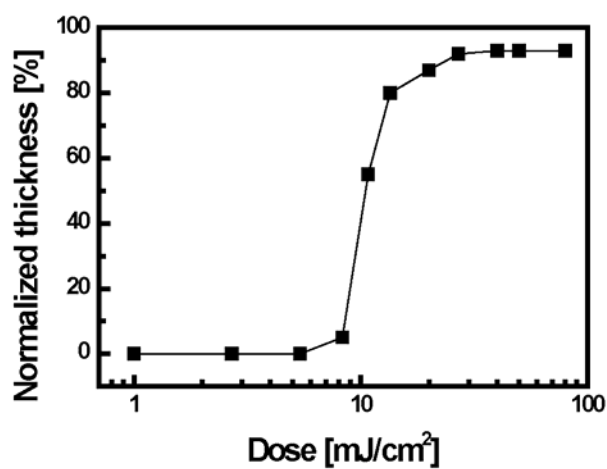

**Figure S2.** Relationship between UV irradiation dose and amount of formed layer. The initial thickness of PVA was 210 nm.

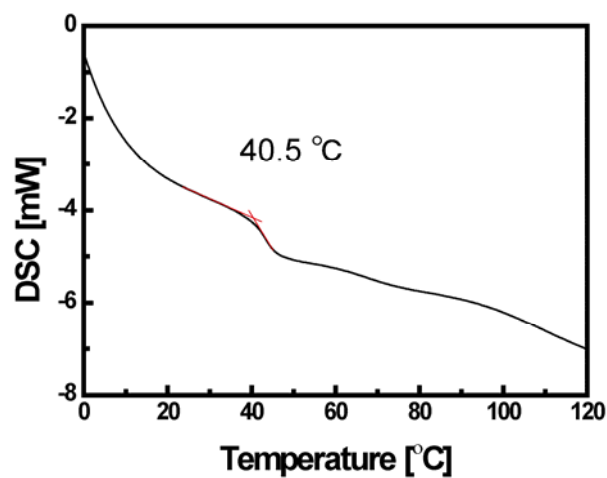

**Fig. S3** DSC heat flow curve of dry PAV sample as a function of temperature.

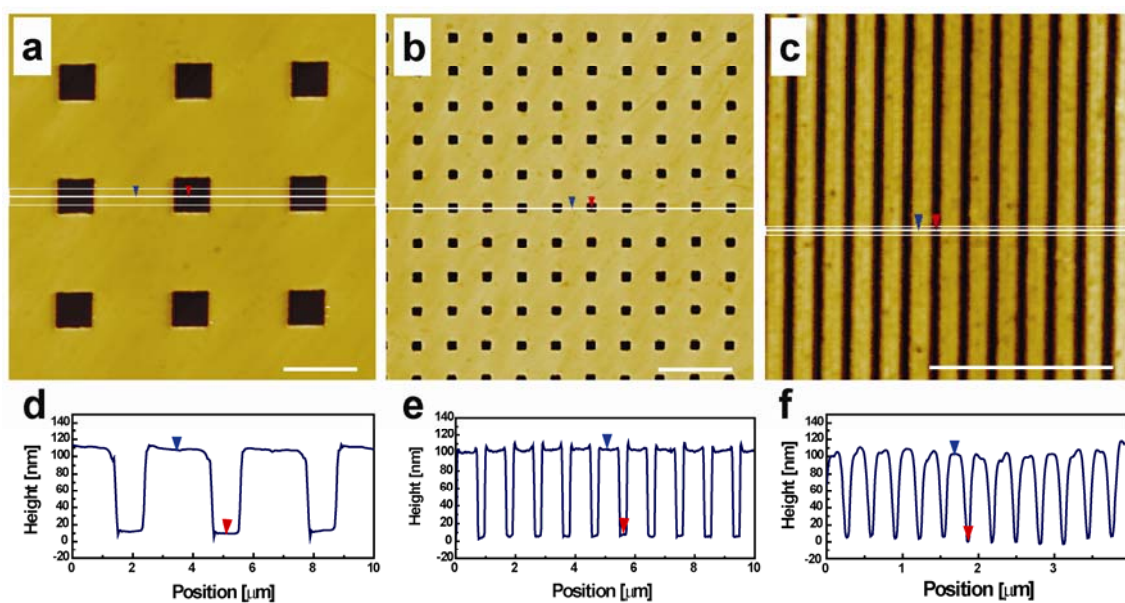

**Fig. S4** (a-c) Height and (d-f) cross-sectional TM-AFM images of (a, d) 1- $\mu\text{m}$ , (b, e) 300-nm and (c, f) 100-nm patterned PVA on gold substrates after mold separation in air (Scheme 1a, stage III). Scale bars: 2  $\mu\text{m}$ .

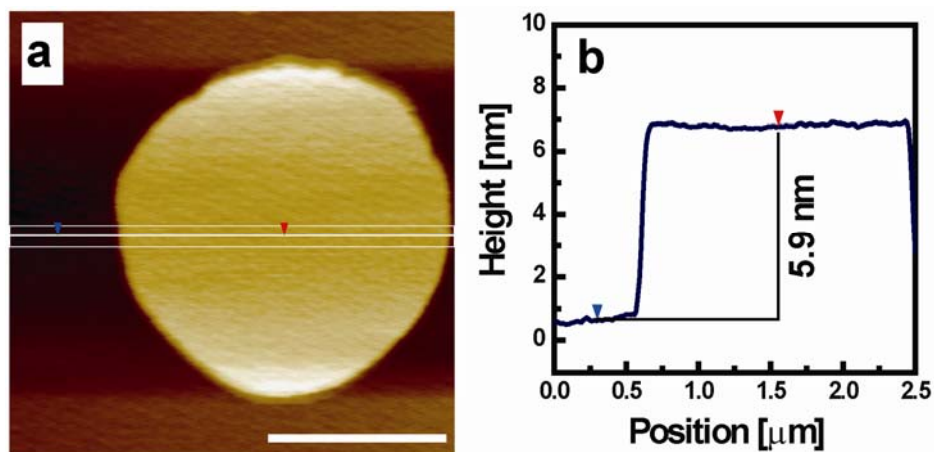

**Fig. S5** (a) Planar and (b) cross-sectional AFM images of sLBMs composed of POPS/SM/cholesterol (1:1:1 molar ratio) on freshly cleaved mica in PBS. Scale bar: 1  $\mu\text{m}$ .
